# Supplementary material for: Impact of nano-TiO2 on horizontal transfer of resistance genes mediated by filamentous phage transduction
Source: Royal Society of Chemistry journal article supplement (doi:10.1039/c9en01279f), 2020-01-01
Supplement: c9en01279f1.pdf [file c9en01279f1.pdf]

*Supporting Information for*

**Impact of nano-TiO<sub>2</sub> on horizontal transfer of resistance genes mediated by  
filamentous phage transduction**

Xue Han<sup>a,†</sup>, Peng Lv<sup>a,†</sup>, Lu-Guang Wang<sup>b</sup>, Fei Long<sup>b</sup>, Xiao-Lin Ma<sup>a</sup>, Yu-Jie Feng<sup>c,\*</sup>,  
Ming-Feng Yang<sup>a</sup>, Xiang Xiao<sup>a, c\*</sup>, Chang Liu

<sup>a</sup> School of The Environment and Safety Engineering, Jiangsu University, Zhenjiang,  
212013, China

<sup>b</sup> Department of Biological and Ecological Engineering, Oregon State University,  
Corvallis, OR 97333, USA

<sup>c</sup> State Key Laboratory of Urban Water Resource and Environment, Harbin Institute of  
Technology, Harbin 150090, China

<sup>†</sup> These authors contributed equally to this work.

**\* Corresponding authors:**

Ph.D. Xiang Xiao, Fax: +86-511-88790955; E-mail: [xiaox@ustc.edu.cn](mailto:xiaox@ustc.edu.cn)

Prof. Yu-Jie Feng, Fax: +86-451-86283068; E-mail: [yujief@hit.edu.cn](mailto:yujief@hit.edu.cn)

**Table S1** Target primers used in this study

| <b>Target primers</b> | <b>Primer sequences (5'-3')</b> | <b>Length (bp)</b> |
|-----------------------|---------------------------------|--------------------|
| <i>rpoA</i> -F        | GGAAACCAACGGCACAATC             | 193                |
| <i>rpoA</i> -R        | GCAGTTAGCAGAGCGGACAG            |                    |
| <i>traV</i> -F        | GCCTGGCTGAAGGGAAC               | 176                |
| <i>traV</i> -R        | CGGCGTAACTGAACTGACC             |                    |
| <i>traX</i> -F        | GCGGAAGACAGAATGGAAC             | 117                |
| <i>traX</i> -R        | CAGCACCGTCATCACAAGG             |                    |
| <i>traA</i> -F        | AGTG TTCAGGGTGCTTCT             | 191                |
| <i>traA</i> -R        | GCCTTAACCGTGGTGTT               |                    |

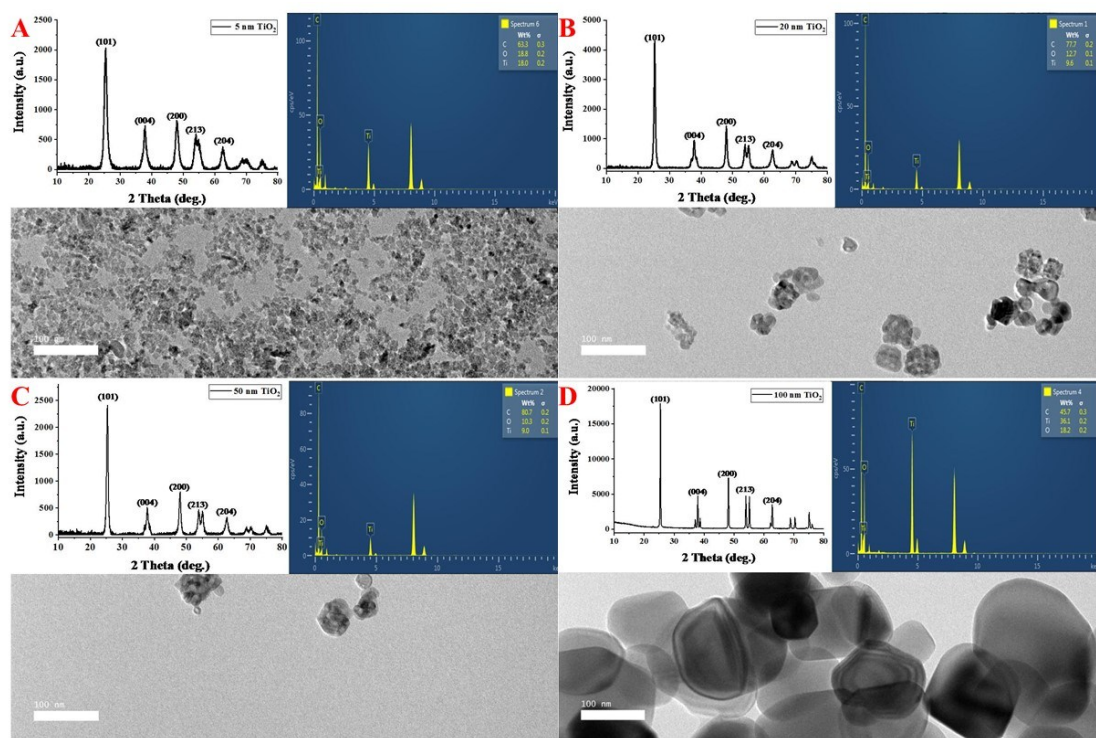

**Figure S1** Characterization of nano-TiO<sub>2</sub> using TEM, EDS spectrum and XRD. A, 5 nm nano-TiO<sub>2</sub>; B, 20 nm nano-TiO<sub>2</sub>; C, 50 nm nano-TiO<sub>2</sub>; D, 100 nm nano-TiO<sub>2</sub>.

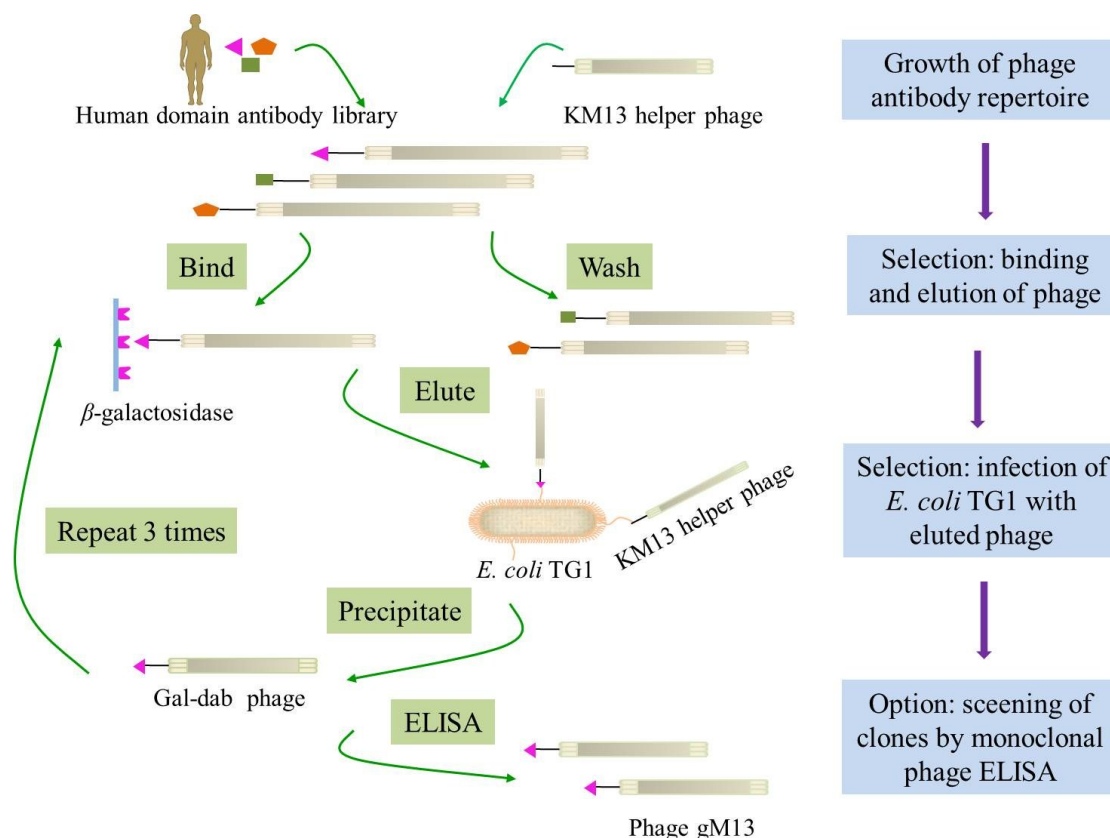

**Figure S2** Selection of phage gM13 against  $\beta$ -galactosidase used in this study

Briefly, the library phages were produced by infecting of Dab library culture (500 mL) with KM13 helper phage ( $1 \times 10^{12}$  PFU/mL), and precipitated by PEG/NaCl (PEG 6000, 20%; NaCl, 1.5M) after overnight production. The biotinylated  $\beta$ -galactosidase (Sigma, USA) was used to select the specific domain antibody against galactosidase (Gal-Dab), which was incubating with Dab library phages for 15 min. Then panning was performed by adding 100  $\mu$ l magnetic streptavidin beads for 15 min. The non-specific phages were removed by washing 10 times with PBST in the magnetic field. The specific phage was eluted with DTT, and used to infect exponentially growing *E. coli* TG1. TG1 colonies from the first round of selection were scraped from 2 $\times$ TY agar plates containing ampicillin and infected with KM13 helper phages. The Gal-Dab phages were concentrated by PEG/NaCl precipitation and subjected to further rounds of selection.

After three rounds of selection, each clone was grown in 96-well V-bottom plates

containing 200  $\mu$ l of 2 $\times$ TY medium supplemented with 100  $\mu$ g/ml of ampicillin and 40 mg/ml glucose and grown overnight at 37°C in a rotary shaker at 250 rpm. Overnight cultures of 5  $\mu$ l were sub-cultured in 96-well V-bottom plates containing 200  $\mu$ l of 2 $\times$ TY medium with 100  $\mu$ g/ml of ampicillin and 40 mg/ml glucose. After incubation for 3 h, KM13 helper phages were added to each well in 50  $\mu$ l 2 $\times$ TY medium. Plates were mixed by gentle agitation and incubated 30 min at 37°C without shaking. After 1 h, plates were centrifuged at 3200 $\times$  g for 10 min at room temperature. Supernatants were discarded and 200  $\mu$ l of 2 $\times$ TY medium supplemented with 100  $\mu$ g/ml of ampicillin, 50  $\mu$ g/ml of kanamycin and 1 mg/ml glucose was added to each well. Phages were produced by overnight incubation at 37°C under gentle agitation. The next day, plates were centrifuged, and the supernatants of each well containing Gal-Dab phage clones were tested in ELISA. A higher response of phage against  $\beta$ -galactosidase and lower cross reaction was picked and termed as phage gM13 for further study.

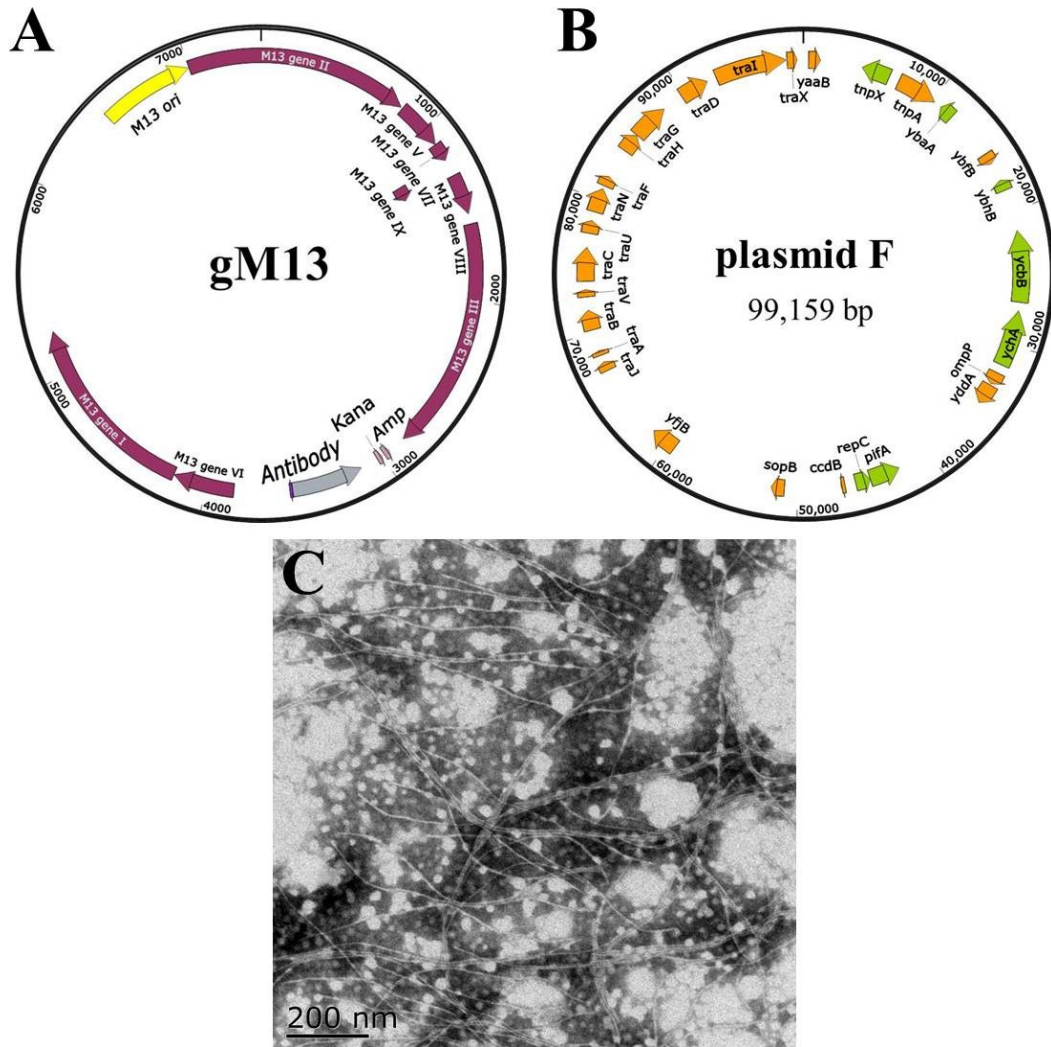

**Figure S3** Gene maps of gM13 (A), plasmid F of *E. coli* TG1 (B) and TEM image of phage gM13 (C).

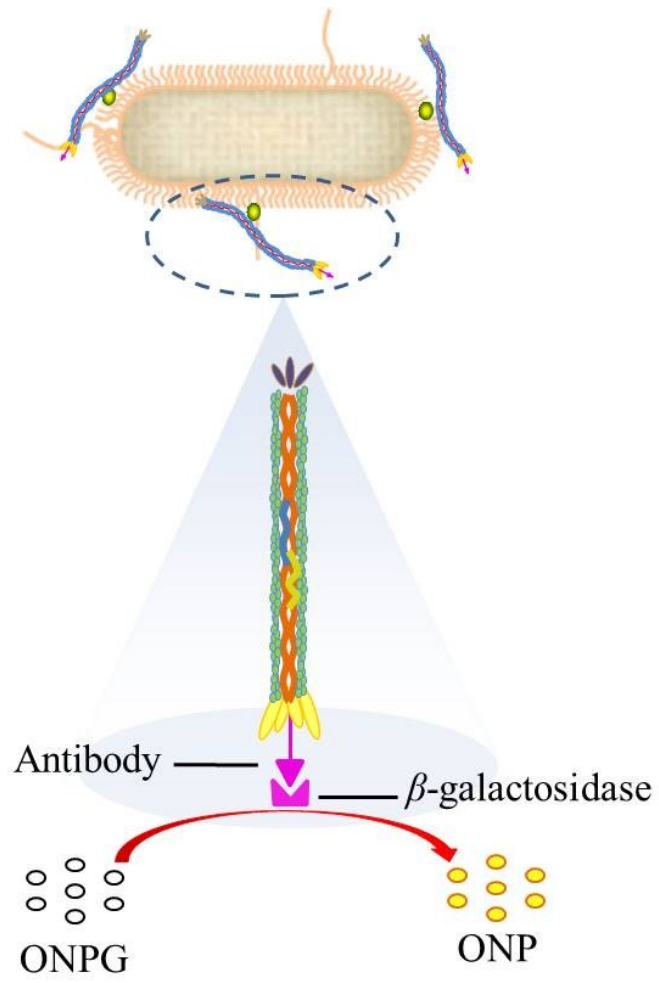

**Figure S4** Schematic diagram for the detection of bacteriophage adsorption.

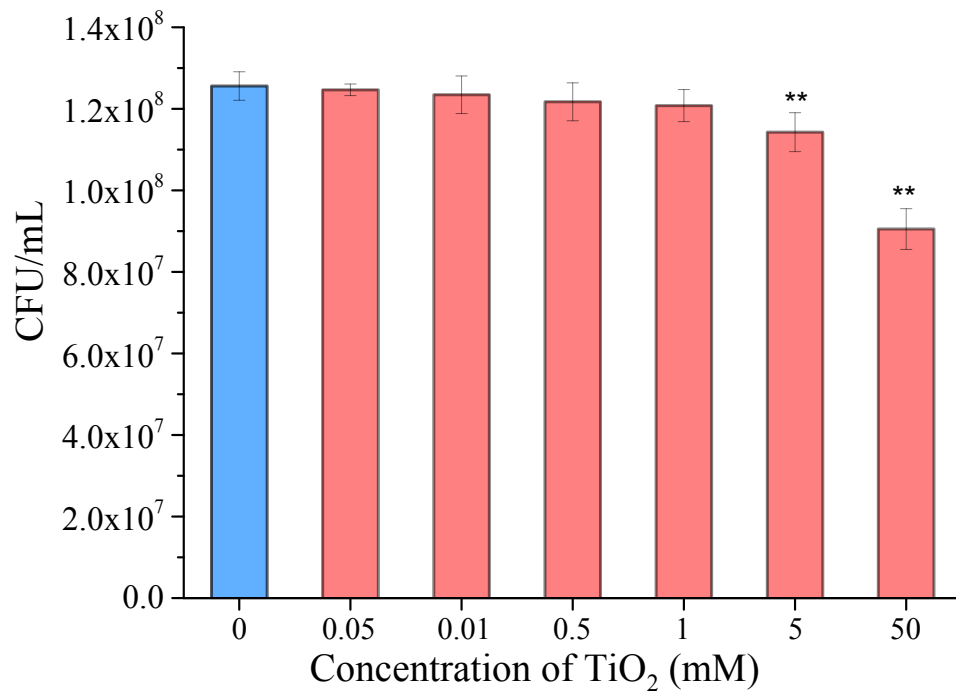

**Figure S5** Effect of different nano-TiO<sub>2</sub> concentrations on colony formation of *E. coli* TG1. All values represent mean  $\pm$  SD. Significant differences between groups were tested with independent-sample t-test and shown with \* ( $p < 0.05$ ), \*\* ( $p < 0.01$ ).



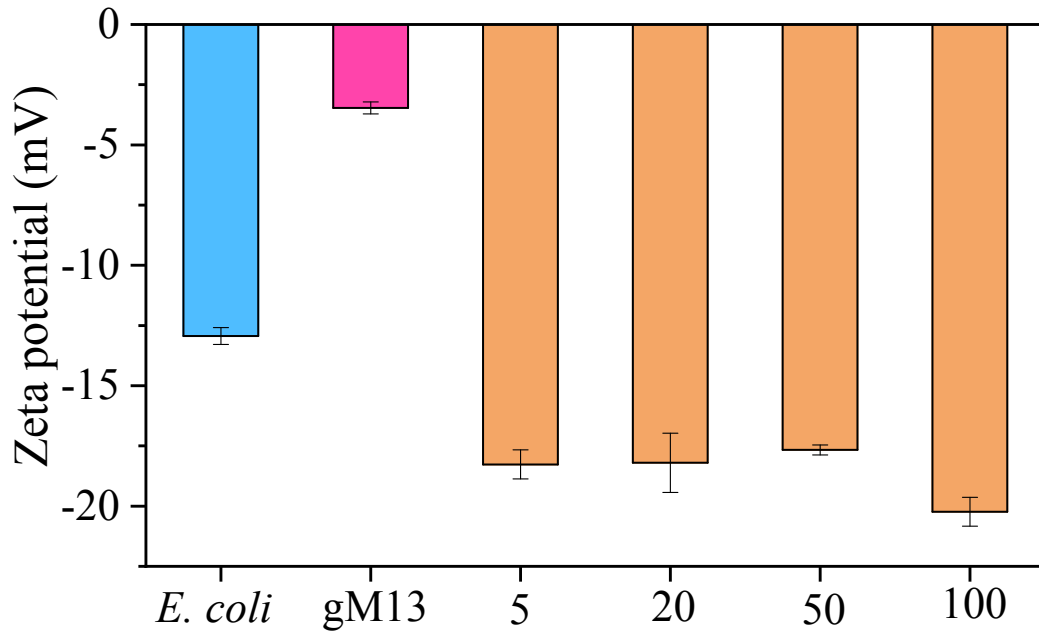

**Figure S6**  $\zeta$ -potentials of *E. coli* TG1 cell, phage gM13 and nano-TiO<sub>2</sub> with different sizes (5, 20, 50, and 100 nm). The concentrations of *E. coli* TG1 cell, phage gM13 and nano-TiO<sub>2</sub> used were  $1.0 \times 10^8$  CFU/mL,  $1.0 \times 10^8$  PFU/mL and 0.5 mM, respectively.  $\zeta$ -potential was measured at 25°C using a nanoparticle size potentiometer (Zetasizer Nano ZS90, Malvern, England). All values represent mean  $\pm$  SD.

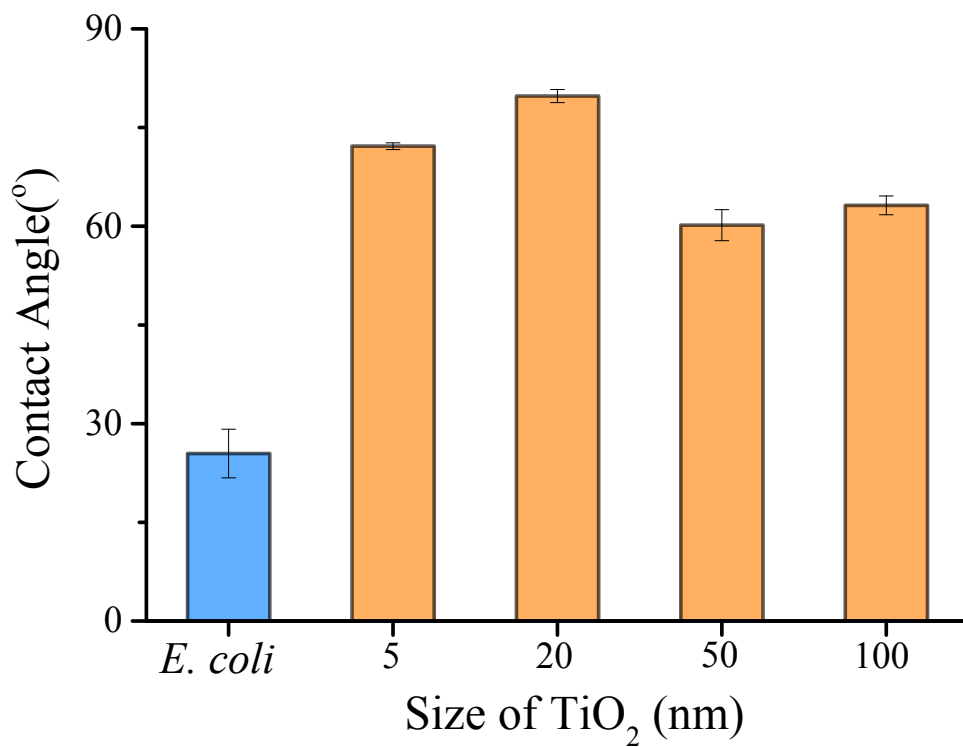

**Figure S7** Contact angles of *E. coli* TG1 and nano-TiO<sub>2</sub> with different sizes (5, 20, 50, and 100 nm). All values represent mean  $\pm$  SD.

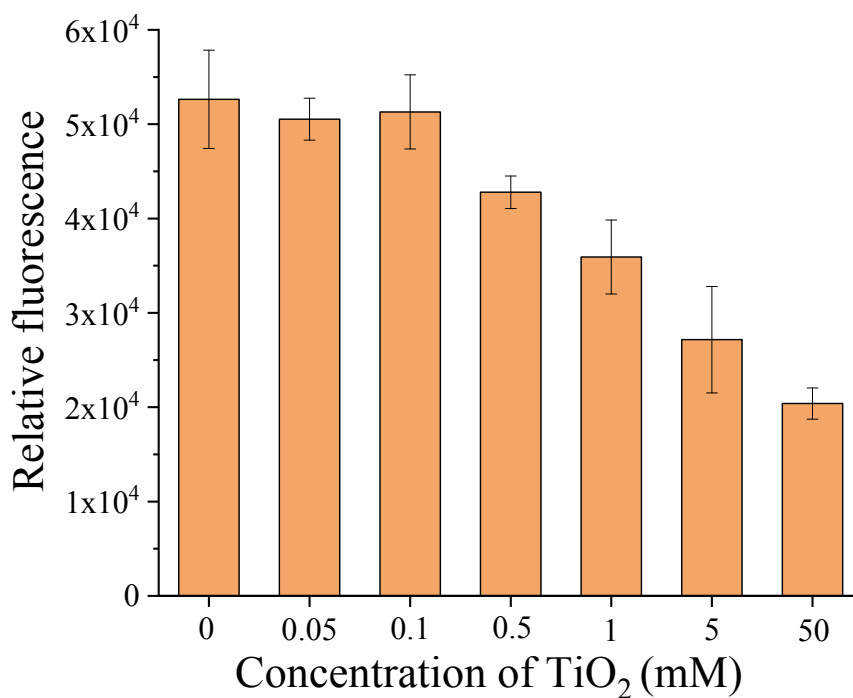

**Figure S8** Interference of different concentrations of nano-TiO<sub>2</sub> on fluorescence-based assay. A gradient concentration of nano-TiO<sub>2</sub> (0, 0.05, 0.01, 0.5, 1, 5, and 50 mM) was prepared with phosphate-buffered saline (PBS, pH=7.0) containing 0.5 mg/L rhodamine B. 200  $\mu$ L of mixed suspension was added into a black 96-well plates and then measured by a fluorescence spectrometer (Infinite M1000 PRO, Tecan, Austria). The excitation and emission wavelengths were set at 556 nm and 580 nm, respectively.

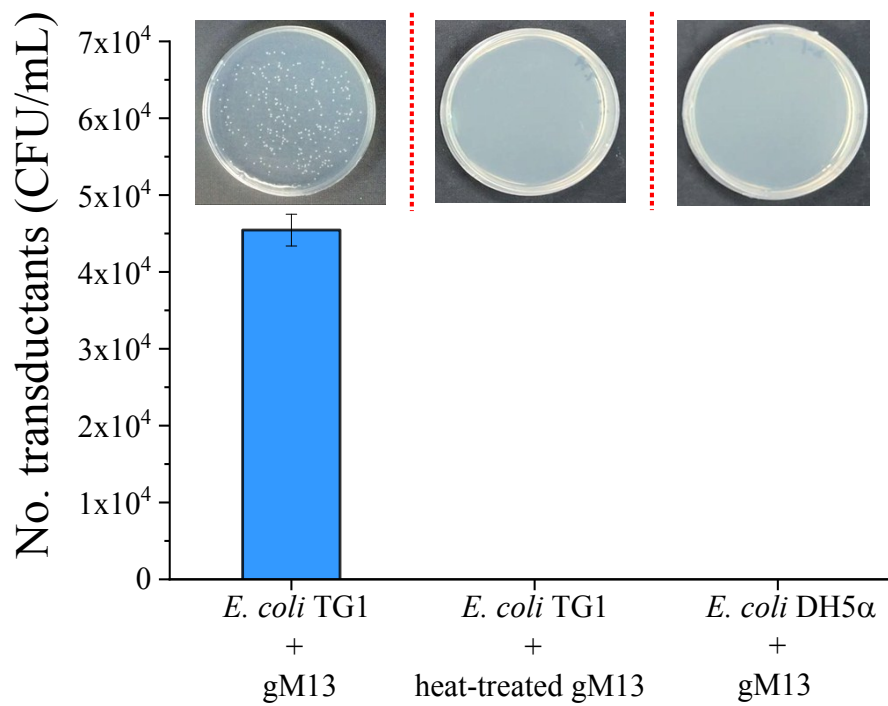

**Figure S9** Assessment of infection specificity of gM13 phage. The group of *E. coli* TG1+gM13 represents that transduction of gM13 to *E. coli* TG1 mediated by nano-TiO<sub>2</sub>; The group of *E. coli* TG1+heat-treated gM13 represents gM13 was treated at 90°C for 1h before being used for transduction; The group of *E. coli* DH5α+gM13 represents that host cell was *E. coli* DH5α rather than *E. coli* TG1. The concentration of nano-TiO<sub>2</sub> was 0.5 mM. The bacterial suspension was diluted 15 times and then coated on LB plates.

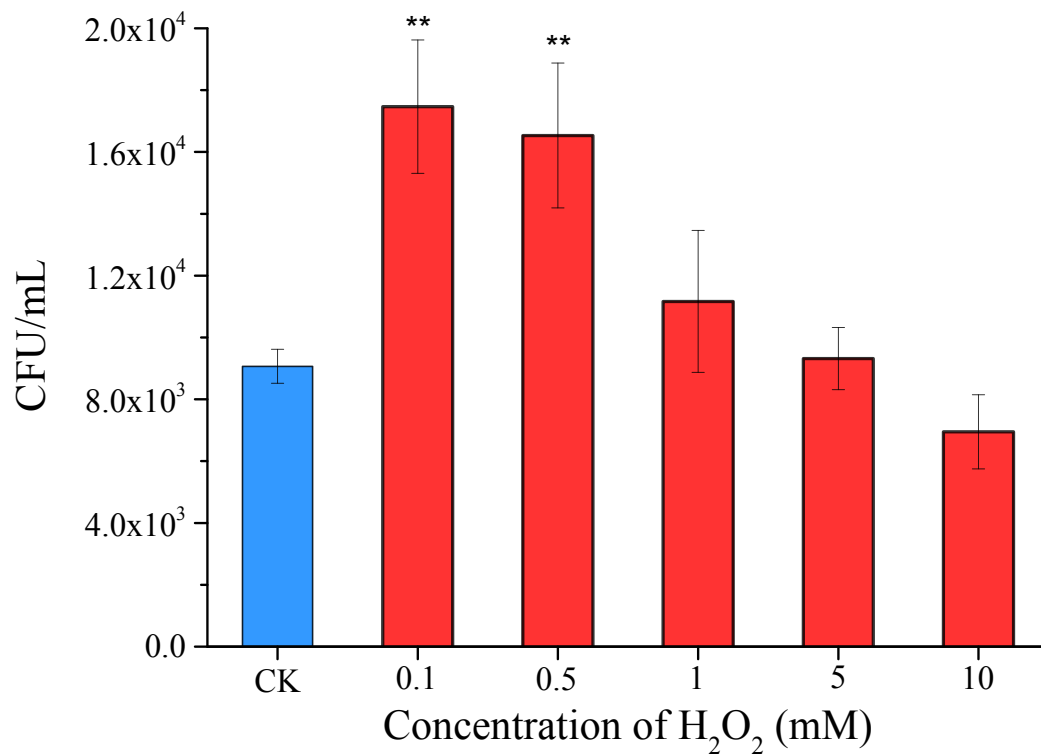

**Figure S10** Effect of H<sub>2</sub>O<sub>2</sub> on gM13 infection. *E. coli* TG1 cells and gM13 were mixed with a ratio of 1:1 (PFU/CFU). Significant differences between groups were tested with independent-sample t-test and shown with \* (p < 0.05), \*\* (p < 0.01).
